# Supplementary material for: Importance of reagent addition order in contaminant degradation in an Fe(ii)/PMS system
Source: Royal Society of Chemistry journal article supplement (doi:10.1039/c6ra14081e), 2016-01-01
Supplement: c6ra14081e1.pdf [file c6ra14081e1.pdf]

## **Support information**

### **Importance of reagents addition order in contaminant degradation in Fe(II)/PMS system**

**Ying Huang, Zhaohui Wang\* , Changling Fang, Wenqian Liu, Xiaoyi Lou and Jianshe Liu**

State Environmental Protection Engineering Centre for Pollution Treatment and Control in Textile Industry, College of Environmental Science and Engineering, Donghua University, Shanghai, 201620, China.

\*Corresponding author: Email: zhaohuiwang@dhu.edu.cn (Z. Wang).

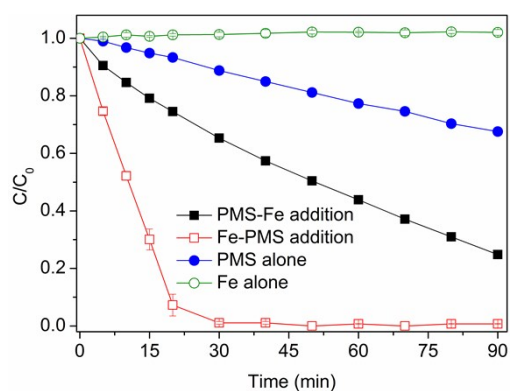

Fig. S1 The degradation of MB as a function of reaction time in Fe(II)/PMS system.

Conditions:  $[MB]_0=0.05$  mM;  $[PMS]_0=0.3$  mM.

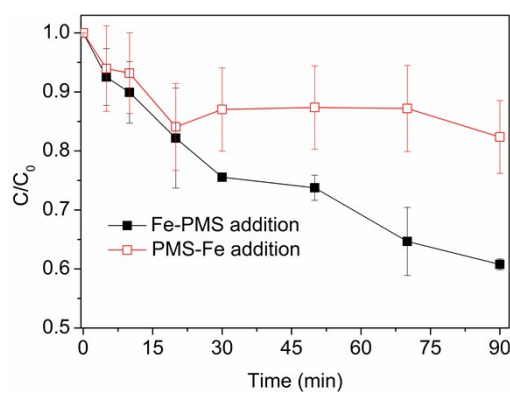

Fig. S2 The degradation of 4-Chloro-2-Nitrophenol (4C2NP) in Fe(II)/PMS system.

Conditions:  $[4C2NP]_0=0.05$  mM;  $[Fe(II)]_0=0.3$  mM;  $[PMS]_0=0.3$  mM

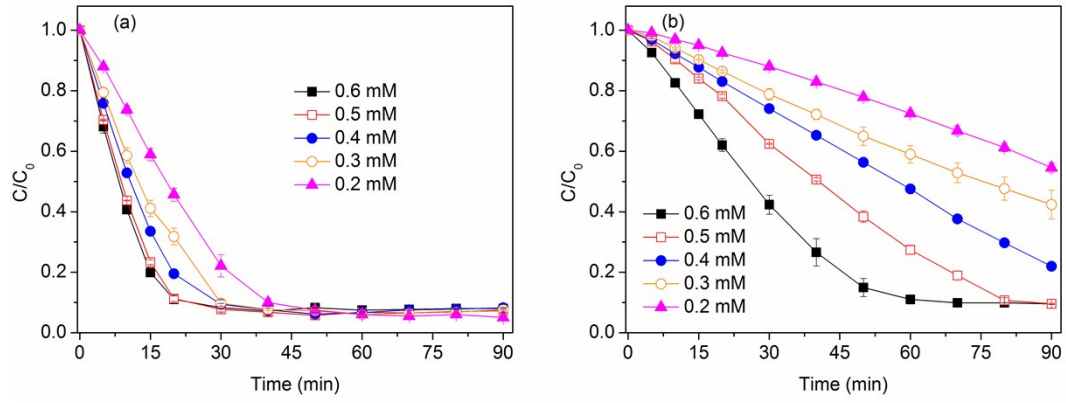

Fig. S3 The degradation of AO7 in Fe(II)/PMS system. (a) Fe(II)-PMS addition; (b) PMS-Fe(II) addition. Conditions:  $[AO7]_0=0.05$  mM;  $[PMS]_0=0.3$  mM; pH=3.0.

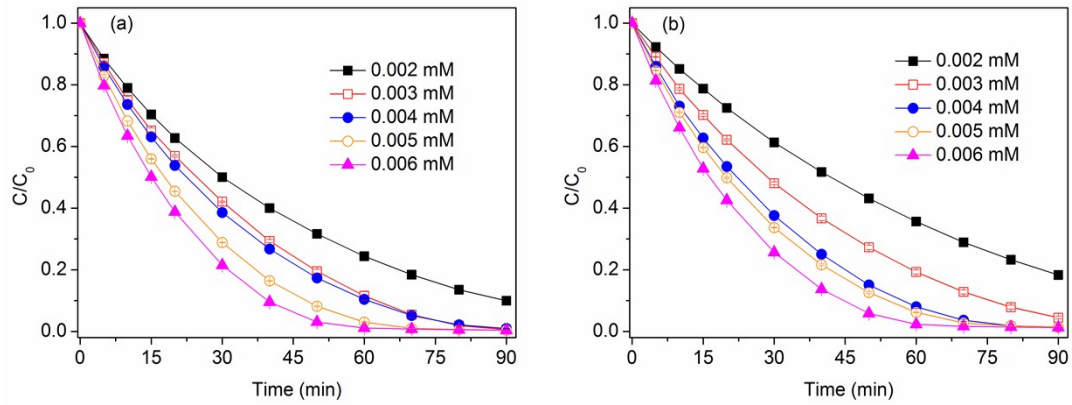

Fig. S4 The degradation of AO7 as a function of reaction time in Co(II)/PMS system. (a) Co(II)-PMS addition; (b) PMS-Co(II) addition. Conditions:  $[AO7]_0=0.05$  mM;  $[PMS]_0=0.3$  mM; pH=3.0.

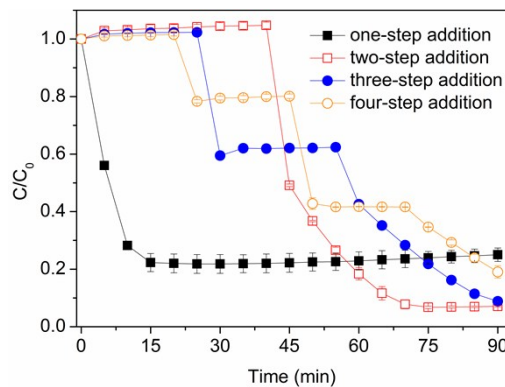

Fig. S5 Stepwise addition of PMS on AO7 degradation process as a function of reaction time in Fe(II)/PMS system. Conditions:  $[AO7]_0=0.1$  mM;  $[Fe(II)]_0=0.6$  mM;  $[PMS]_{total}=0.3$  mM.

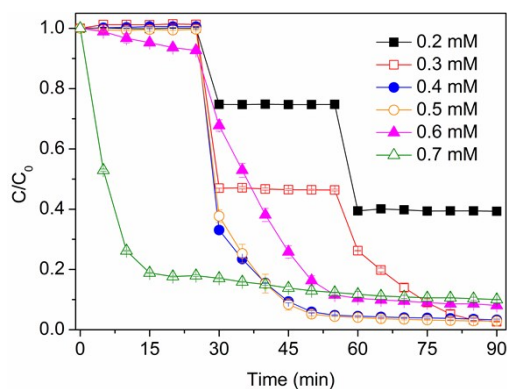

Fig. S6 Effect of PMS concentration on the degradation of AO7 for three-step addition in Fe(II)/PMS system. Conditions:  $[AO7]_0=0.05$  mM;  $[Fe(II)]_0=0.3$  mM.
